# Supplementary material for: Prevalence of SARS-CoV-2 in employees of a general hospital in Northrhine-Westphalia, Germany
Source: PubMed Central journal article supplement — Dtsch Med Wochenschr. 2021 Jan 29;146(5):e30–8. [Article in German] doi: 10.1055/a-1322-5355 (PMC7920642; doi:10.1055/a-1322-5355), 2021-01-29
Supplement: 10-1055-a-1322-5355-s1.pdf [file 10-1055-a-1322-5355-s1.pdf]

## Information und Einwilligungserklärung über die Teilnahme an einer

# Prävalenzstudie zur Häufigkeit von SARS-CoV2 Infektionen bei Beschäftigten im Gesundheitswesen

### im Rahmen der Arbeitsmedizinischen Vorsorge

Ich bin über die Antikörpertestung (Blutentnahme) und die PCR-Untersuchung (Nasen-Rachenabstrich) im Rahmen der arbeitsmedizinischen Vorsorge aufgeklärt worden.

Ich stimme der Weitergabe meiner Daten an das Universitätsklinikum Hamburg-Eppendorf, der Berufsgenossenschaft für Gesundheitsdienst und Wohlfahrtspflege (BGW) und das Labor Wisplinghoff in pseudonymisierter Form für wissenschaftliche Auswertungen und Veröffentlichungen zu. Pseudonymisiert bedeutet, dass keine Angaben von Namen oder Initialen verwendet werden, sondern nur ein Nummerncode.

Mir ist bekannt, dass ich meine Zustimmung zu der Weitergabe der Daten bis zum Zeitpunkt der Pseudonymisierung der Daten jeder Zeit widerrufen kann.

Nach der mündlichen Aufklärung durch Frau Dr. Cranen oder Herrn Prof. Michels und dem Durchlesen der Mitarbeiterinformation geben Sie freiwillig Ihre schriftliche Einwilligung zur Teilnahme an der Studie.

Ich bestätige, vollständige und wahrheitsgemäße Angaben zu meiner Krankengeschichte, meinem Gesundheitszustand, zur Einnahme von Arzneimitteln sowie weiteren Fragen im Zusammenhang mit der Studie gemacht zu haben.

Ich habe jederzeit das Recht, ohne Angabe von Gründen von der Studie zurückzutreten, ohne dass für mich Nachteile in der arbeitsmedizinischen Vorsorge daraus entstehen.

Ich bin damit einverstanden, dass zu Forschungszwecken von mir entnommenes Biomaterial (Blut-/Nasen-Rachen-Abstrichproben) und daraus gewonnene medizinische Daten aufbewahrt und gespeichert werden.

Einzelheiten habe ich aus der Mitarbeiterinformation entnommen, welche mir im Vorfeld elektronisch zugesandt bzw. ausgehändigt wurde.

## Einwilligungserklärung zum Datenschutz

*Bei dieser Studie werden personenbezogene Daten und medizinische Befunde über Sie erhoben. Die Speicherung, Weitergabe und Auswertung dieser Daten erfolgt gemäß gesetzlichen Bestimmungen und setzt vor Teilnahme an der Studie die folgende freiwillige Einwilligung voraus:*

① Ich erkläre mich damit einverstanden, dass im Rahmen dieser Studie erhobene Daten/ Krankheitsdaten auf Fragebögen und elektronischen Datenträgern und in anonymisierter Form aufgezeichnet (ohne Namensnennung) weitergegeben werden (Universitätsklinikum Hamburg-Eppendorf und Labor Wisplinghoff).

② Ich erkläre mich damit einverstanden, dass meine Daten nach Beendigung oder Abbruch der Studie bis zu zehn Jahre aufbewahrt werden.

Danach werden meine personenbezogenen Daten gelöscht, soweit nicht gesetzliche Aufbewahrungsfristen entgegenstehen.

③ Ich bin darüber aufgeklärt worden, dass ich jederzeit die Teilnahme an der Studie beenden kann. Dies schließt auch das Recht ein, meine Einwilligung in die Datenverarbeitung zu widerrufen.

In diesem Falle wird der Personenbezug zu den Daten gelöscht.

---

Vorname / Nachname

---

Eschweiler, den

---

Unterschrift des Mitarbeiters
