# Supplementary material for: Prevalence of SARS-CoV-2 in employees of a general hospital in Northrhine-Westphalia, Germany
Source: PubMed Central journal article supplement — Dtsch Med Wochenschr. 2021 Jan 29;146(5):e30–8. [Article in German] doi: 10.1055/a-1322-5355 (PMC7920642; doi:10.1055/a-1322-5355), 2021-01-29
Supplement: 10-1055-a-1322-5355-s3.pdf [file 10-1055-a-1322-5355-s3.pdf]

## **Prävalenzstudie zur Häufigkeit von SARS-CoV2 Infektionen bei Beschäftigten im Gesundheitswesen im Rahmen der Arbeitsmedizinischen Vorsorge**

Sehr geehrte Mitarbeiterin,  
sehr geehrte Mitarbeiter,

### **Allgemeine Informationen und Ziele der Studie**

Sicherlich fragen sich viele von Ihnen gerade, ob Sie möglicherweise schon eine Infektion mit dem Coronavirus SARS-CoV-2 durchgemacht haben. Unerkannte Infektionen bei medizinischem Personal sind eine mögliche Bedrohung für die Betroffenen, für Ihre Angehörigen sowie für andere Kollegen und natürlich für die von Ihnen betreuten Patienten.

Der Schutz des medizinischen Personals ist sowohl am St.-Antonius-Hospital als auch auf der Ebene des Robert-Koch Instituts (RKI) bezogen auf die allgemeinen Arbeitsschutzanforderungen, die Sicherstellung der medizinischen Versorgung und der Prävention nosokomialer Infektionen von großer Bedeutung.

Die organisatorischen Maßnahmen und die persönliche Schutzausrüstung dienen einer Minimierung des Infektionsrisikos. Die Arbeitsbedingungen können jedoch trotz gewissenhaften Umgangs und Schutzmaßnahmen so sein, dass nicht selten unbemerkt Fehler in der Handhabung geschehen. Eine Exposition kann daher nicht vollständig ausgeschlossen werden.

Medizinisches Personal, welches engen Kontakt zu bestätigten COVID-19 Fällen hat, wird auch bei Einsatz von adäquaten Schutzmaßnahmen als Kontaktperson der Kategorie III zugeordnet. Entsprechend erfolgt auch in diesen Fällen eine weitere Beobachtung entsprechend den RKI-Richtlinien.

Die Süddeutsche Zeitung berichtete vor kurzem, dass in Großbritannien ein Viertel aller Ärzte sich entweder in Quarantäne befinden oder infiziert seien. Bei den Pflegekräften sind ca. 20 % betroffen. In Italien, als besonders betroffenes Risikogebiet, nennen offizielle Stellen 66 Tote und ca. 6.500 infizierte Ärzte bzw. Pflegekräfte.

Wie hoch ist wohl der Durchseuchungsgrad mit dem neuen Coronavirus SARS-CoV-2 in unserem Haus bei den Mitarbeitern? Wie viele von Ihnen haben bereits eine Infektion durchgemacht und sind jetzt zumindest für eine gewisse Zeit immun?

Im Rahmen der Arbeitsmedizinischen Vorsorge bieten wir Ihnen daher an, Ihr Blut auf Antikörper gegen SARS-CoV-2 gezielt zu untersuchen. Zudem erhalten Sie einen zusätzlichen Nasen-Rachenabstrich, um auch die kleinste diagnostische Lücke der Unsicherheit zu schließen.

Über das Testergebnis werden Sie informiert, sofern Sie dies wünschen. Möglicherweise können die Testergebnisse bei der Einsatzplanung hilfreich sein. Falls die Zahlen der COVID-Fälle weiter ansteigen sollten, könnten Beschäftigte, die bereits Antikörper gegen SARS-CoV2 entwickelt haben, unproblematisch auf der Internistischen Notaufnahmestation, der Intensivstation bzw. auf der Infektionsstation weiter eingesetzt werden.

In Deutschland gibt es bisher noch keine verlässlichen Daten zur Häufigkeit von SARS-CoV2 Infektionen bei Beschäftigten im Gesundheitswesen. Deshalb sind die Ergebnisse der Antikörpertestungen im Rahmen der arbeitsmedizinischen Betreuung von wissenschaftlichem Interesse. Neben der individuellen Beratung ➤➤

ist daher eine pseudoanonymisierte Auswertung geplant. Pseudonymisiert bedeutet, dass keine Angaben von Namen oder Initialen verwendet werden, sondern nur ein Nummerncode.

Insbesondere soll die Frage beantwortet werden, ob bestimmte Risikokonstellationen für die SARS-CoV2 Infektion bei Beschäftigten im Gesundheitswesen existieren.

### » Vertraulichkeit der Daten, Datenverarbeitung und Datenschutz

Im Rahmen der Studie werden Ihre Daten, Blut-/Nasen-Rachen-Abstrichproben und Krankheitsdaten einschließlich der Daten über Geschlecht und Alter pseudoanonymisiert, d. h. ohne Namensnennung sondern nur kodiert durch eine Nummer, aufgezeichnet. Eine Zuordnung ist nur über eine bei der Betriebsärztin Dr. Rita Cranen elektronisch hinterlegte Sicherheitsverschlüsselte Identifikationsliste möglich. Die im Rahmen der Studie erhobenen Daten werden von einem elektronischen Datensystem erfasst und statistisch ausgewertet. Nach Beendigung der Studie werden alle Daten nach den derzeit gültigen Vorschriften entsprechend gespeichert und archiviert.

Die Datenauswertung erfolgt am Universitätsklinikum Hamburg-Eppendorf (UKE) durch das Kompetenzzentrum für Epidemiologie und Versorgungsforschung bei Pflegeberufen ([www.CVcare.de](http://www.CVcare.de); Prof. Dr. A. Nienhaus) sowie durch das Labor Wisplinghoff in Köln (Prof. Dr. H. Wisplinghoff) zusammen mit Prof. Dr. G. Michels. Alle Bestimmungen des Datenschutzes und der ärztlichen Schweigepflicht werden eingehalten.

Während der ganzen Studie und bei den erwähnten Kontrollen wird die Vertraulichkeit strikt gewahrt, sämtliche beteiligten Personen sind zur Einhaltung der Schweigepflicht verpflichtet. Aufgrund des in biologischen Proben enthaltenen genetischen Materials kann eine Re-Identifizierung jedoch nicht vollständig ausgeschlossen werden. Mit den heutigen technischen Möglichkeiten ist dies jedoch noch sehr aufwändig und auch von daher unwahrscheinlich.

Ihre Daten werden über einen Zeitraum von 10 Jahren in einem sicheren System gespeichert und im Anschluss gelöscht, sofern gesetzliche Gründe nicht eine längere Speicherung vorschreiben. Die Lagerungsdauer der Blutproben für mögliche Labornachbestimmungen beträgt höchstens zwei Jahre; nach dieser Zeit werden alle Blutproben entsorgt/vernichtet.

### » Kosten

Die Prävalenzstudie wird über die Berufsgenossenschaft für Gesundheitsdienst und Wohlfahrtspflege (BGW) finanziert. Weder Ihnen noch Ihrer Krankenkasse entstehen im Zusammenhang mit Ihrer Teilnahme zusätzliche Kosten.

### » Verantwortlichkeiten

Verantwortlich für die Durchführung der Untersuchung am St.-Antonius Hospital ist die Betriebsärztin Dr. Rita Cranen. Dr. Cranen steht Ihnen für Rückfragen gerne zur Verfügung.

### » Studienablauf

Vor Beginn der Prävalenzstudie werden Sie in für Sie verständlicher Weise über Wesen, Bedeutung und Tragweite der Studie aufgeklärt. Sofern Sie mit einer Studienteilnahme einverstanden sind, werden Sie darum ersucht, schriftlich Ihre Einwilligung zu erklären. Der Inhalt dieser Aufklärungsinformation wird auf der Einwilligungserklärung dokumentiert. Sie werden darüber aufgeklärt, dass die Teilnahme freiwillig ist und Sie Ihre Teilnahme jederzeit zurückziehen können, ohne dass Ihre arbeitsmedizinische Vorsorge beeinträchtigt wird.

Nach stattgehabter Aufklärung und vorliegendem Einverständnis erfolgt eine Blutentnahme von ca. 8 ml Serum-Vollblut über eine periphere Venenpunktion. Die venöse Entnahme von Blut ist für Sie mit minimalen Risiken verbunden. Es kann in seltenen Fällen zu einer Hämatombildung kommen. Der Nasen-Rachenabstrich zum Nachweis von SARS-CoV2 RNA erfolgt in üblicher Weise, wie es viele von Ihnen im Rahmen der Abstrichdiagnostik schon kennengelernt haben. Die Blut-/Nasen-Rachen-Abstrichproben werden in verschlüsselter Form an das Labor Wisplinghoff in Köln versandt und ausgewertet.

### » Freiwilligkeit der Teilnahme

Ihre Teilnahme an dieser Studie ist freiwillig. Wenn Sie nicht an dieser Studie teilnehmen wollen, haben Sie keine Nachteile für Ihre arbeitsmedizinische Vorsorge zu erwarten. Das gleiche gilt, wenn Sie Ihre einmal gegebene Einwilligung zu einem späteren Zeitpunkt widerrufen. Diese Möglichkeit haben Sie jederzeit. Einen allfälligen Widerruf Ihrer Einwilligung bzw. den Rücktritt von der Studie müssen Sie nicht begründen. <<
